# Supplementary material for: Identification of ACHE as the hub gene targeting solasonine associated with non-small cell lung cancer (NSCLC) using integrated bioinformatics analysis
Source: PubMed Central journal article supplement (PMC10573390; doi:10.7717/peerj.16195), 2023-10-10

**Figure 3B**

**ACHE**

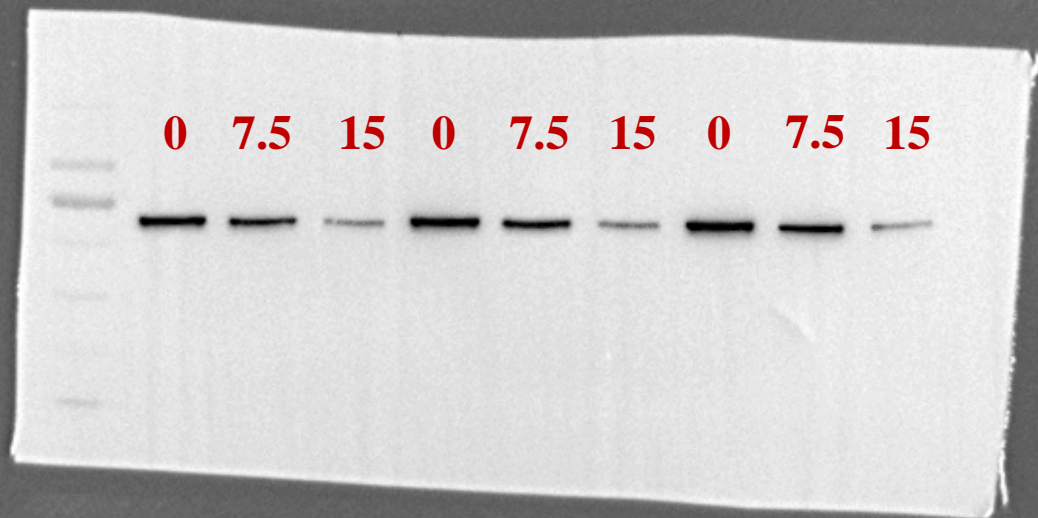

**$\beta$  -Actin**

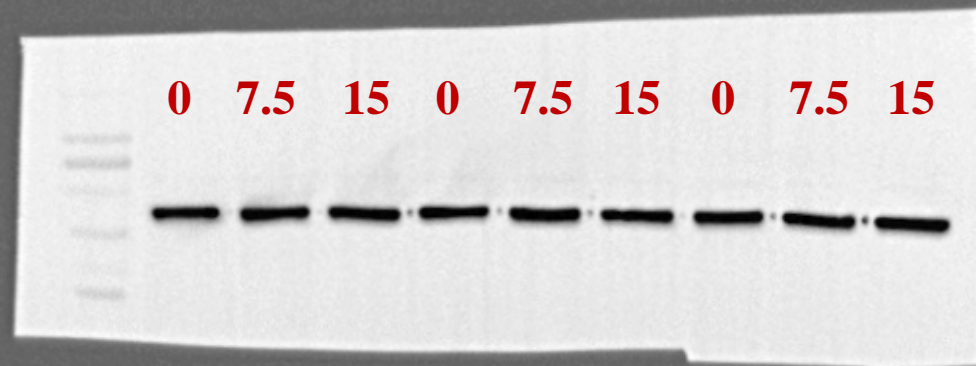

Figure 4A

**Bcl-2**

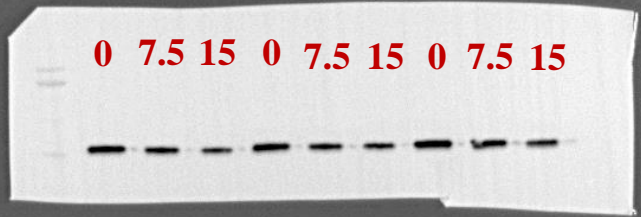

**Bax**

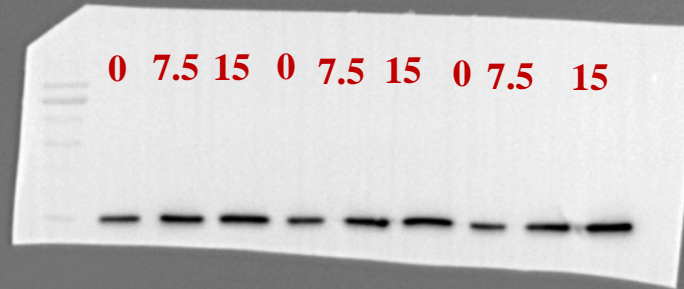

**Cleaved caspase 3**

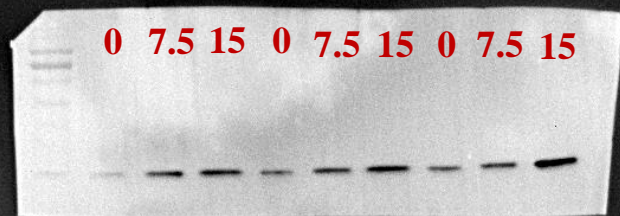

**GAPDH**

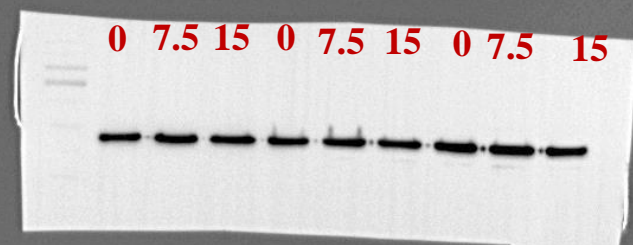

Figure 4D

**IL-1 $\beta$**

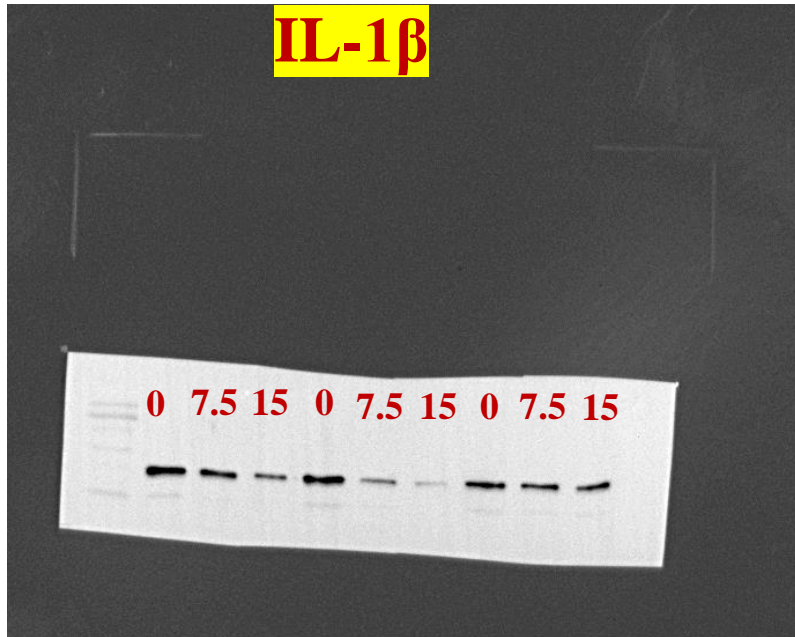

**TNF- $\alpha$**

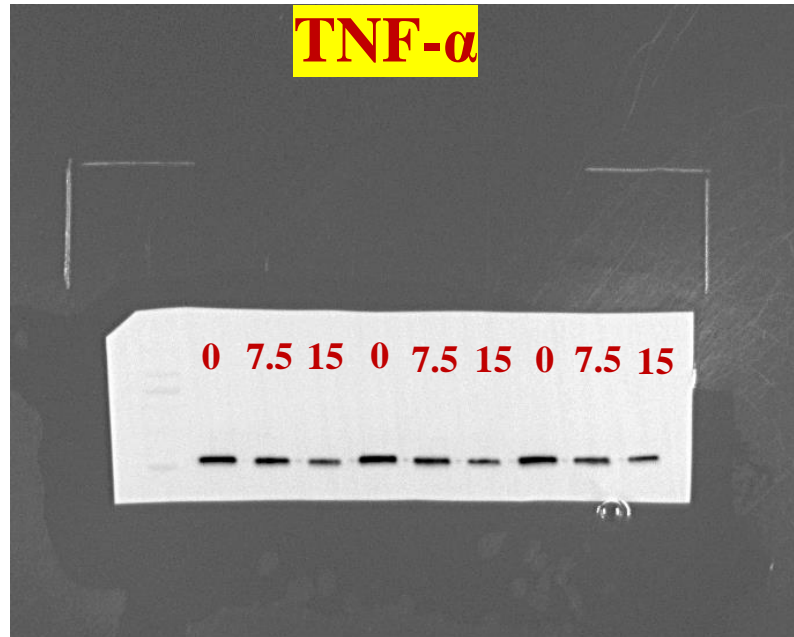

**GAPDH**

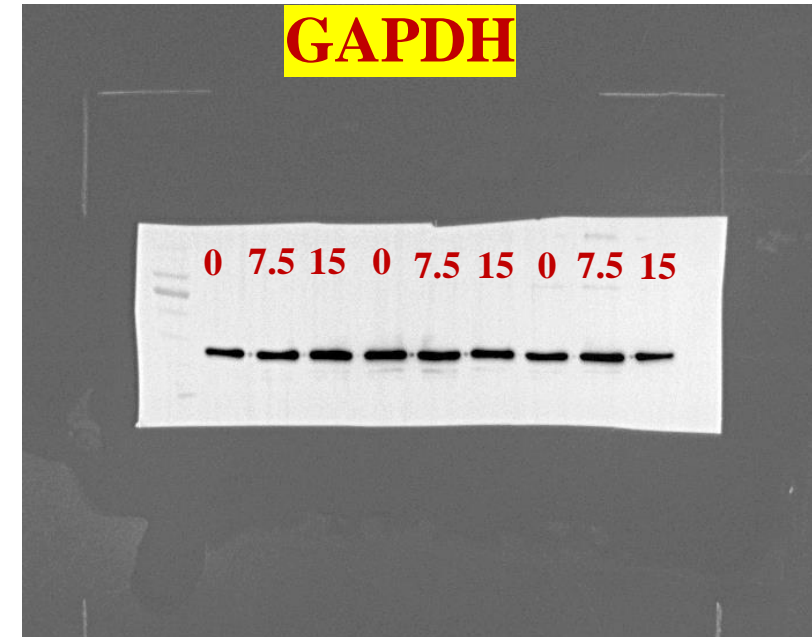

Figure 5A

**p-JNK**

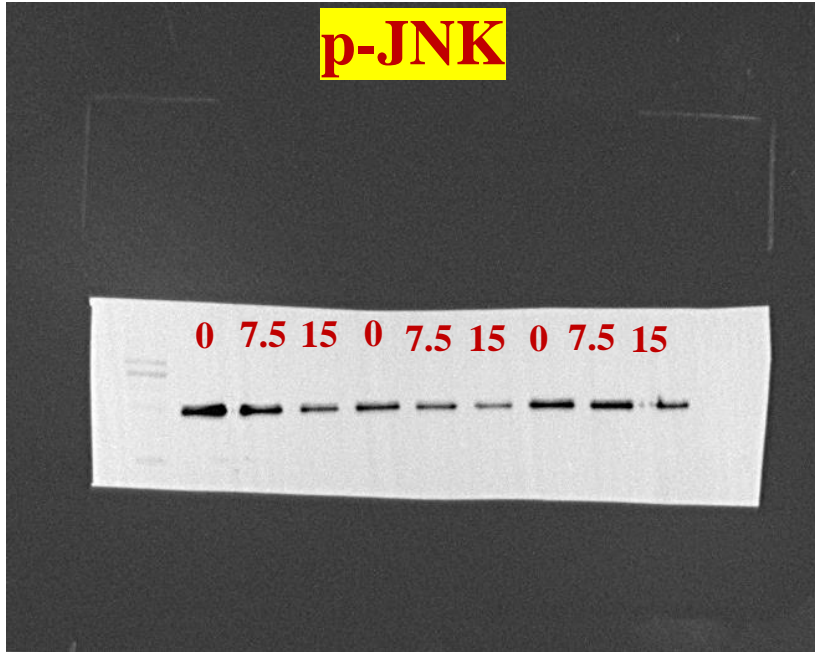

**GAPDH**

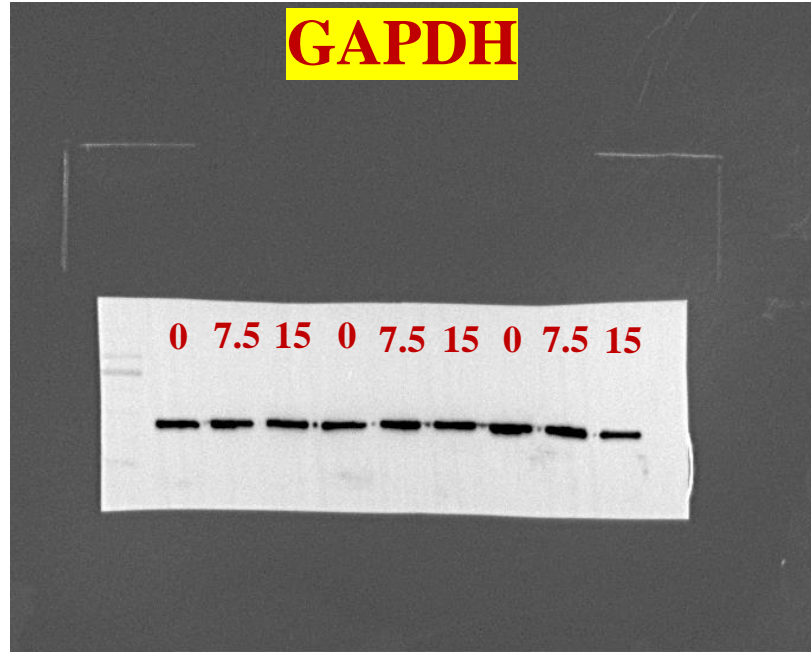

**p-p38 MAPK**

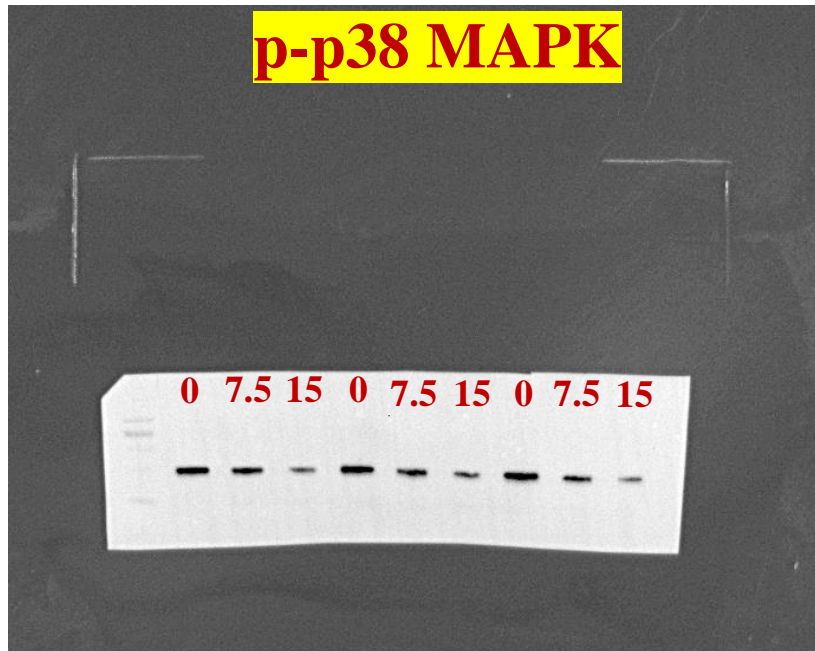

**$\beta$  -Actin**

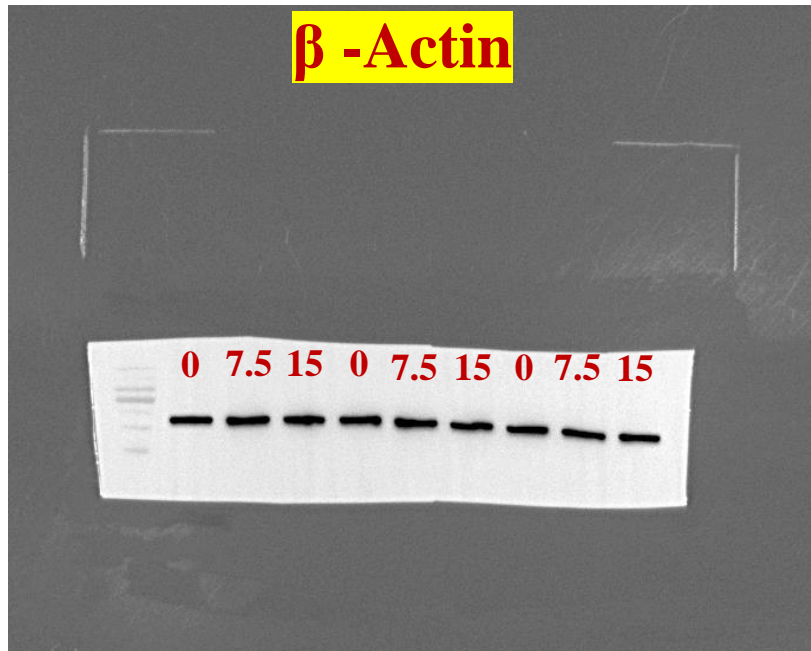

Figure 5E

**ACHE**

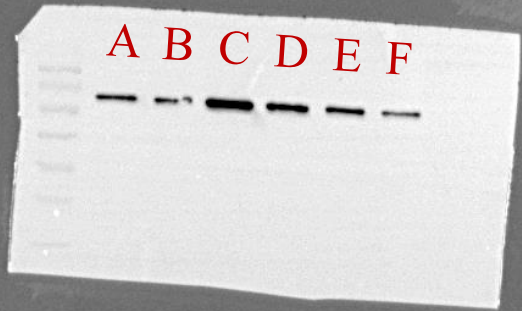

**ACHE**

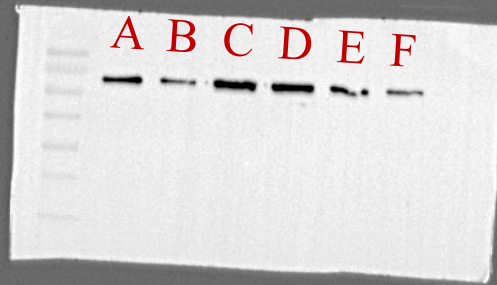

**ACHE**

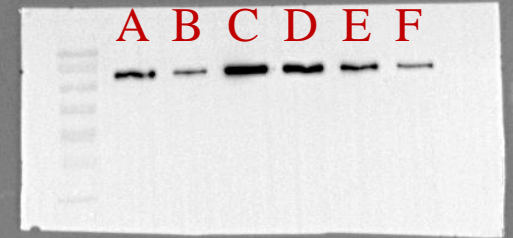

**$\beta$  -Actin**

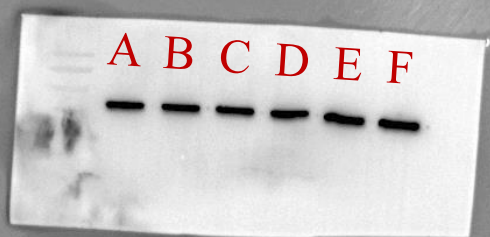

**$\beta$  -Actin**

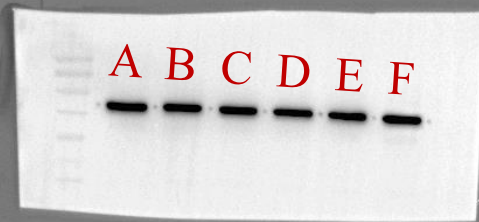

**$\beta$  -Actin**

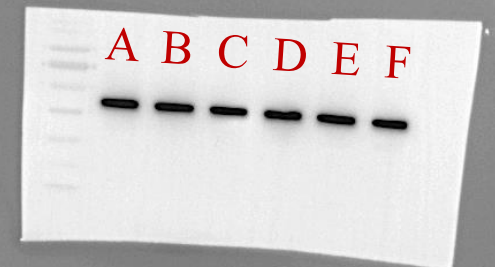

Figure 5F

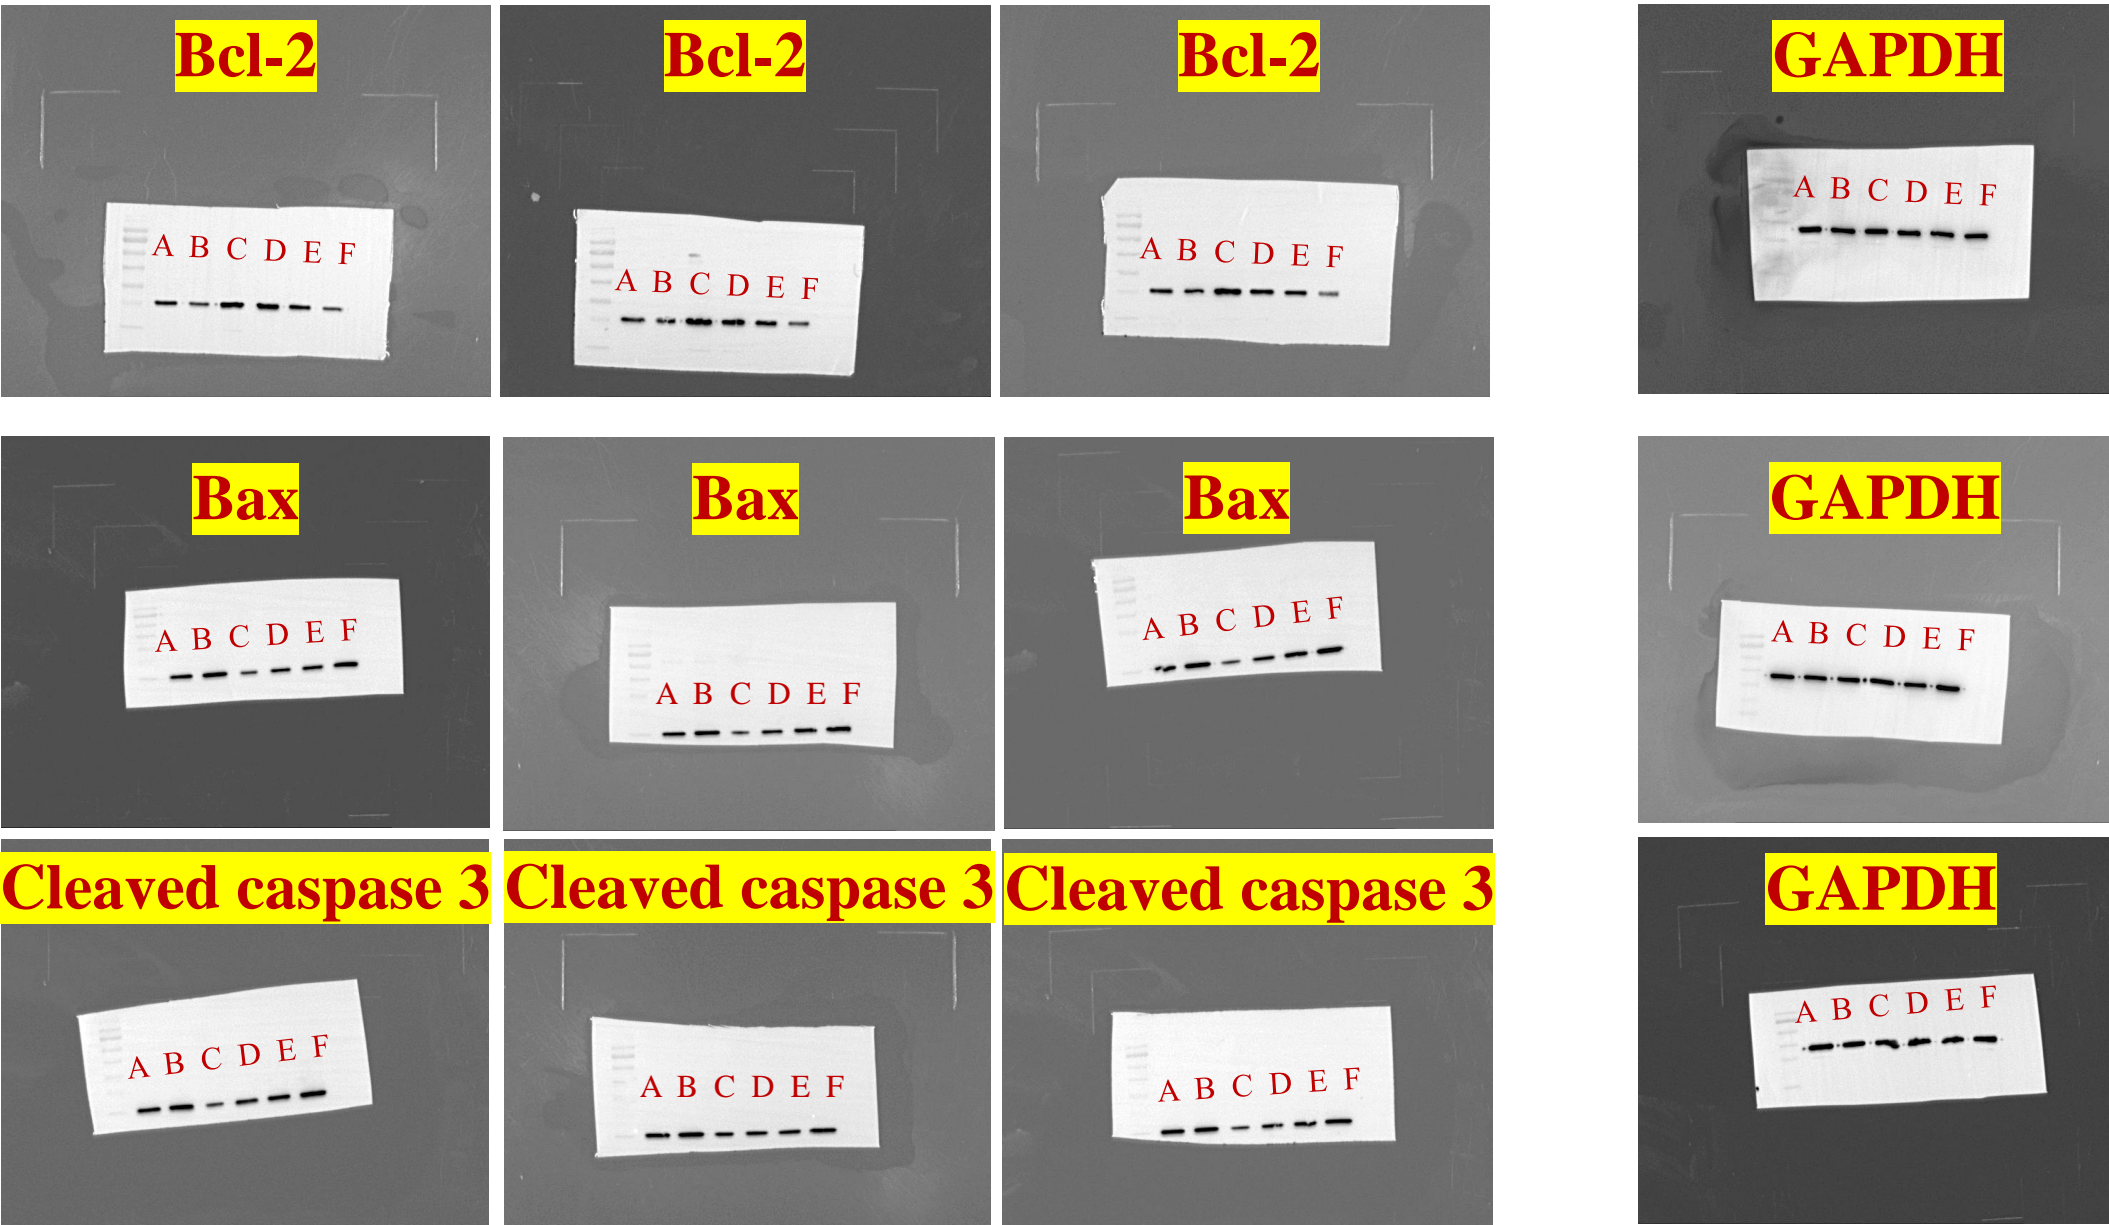

Figure 5G

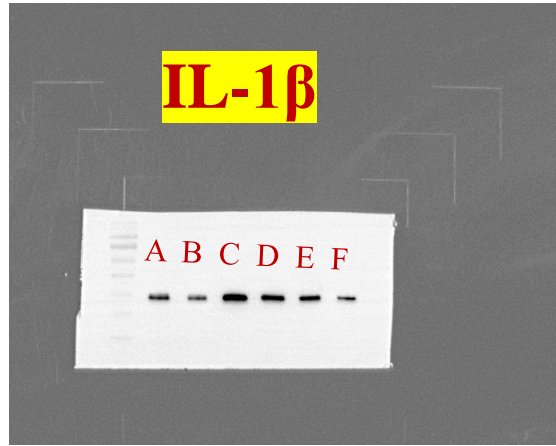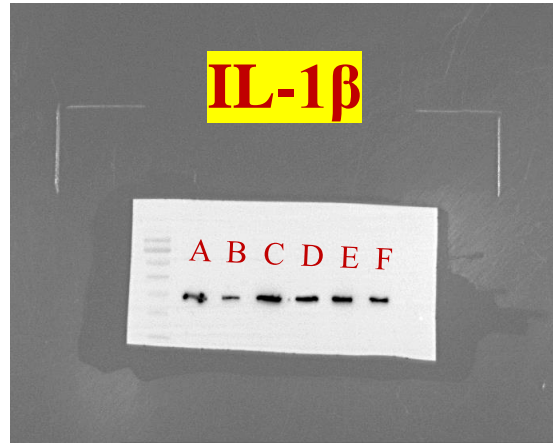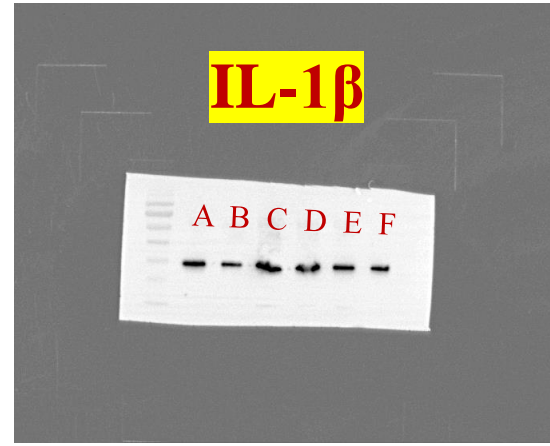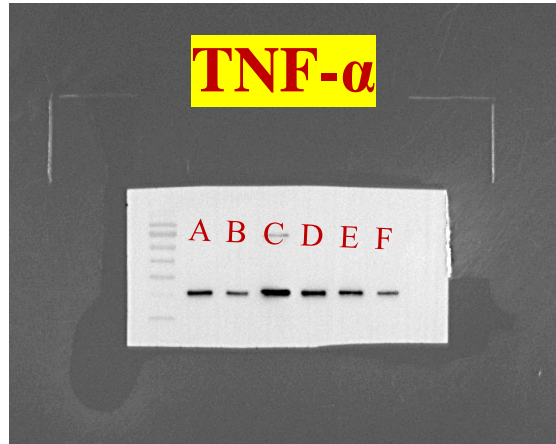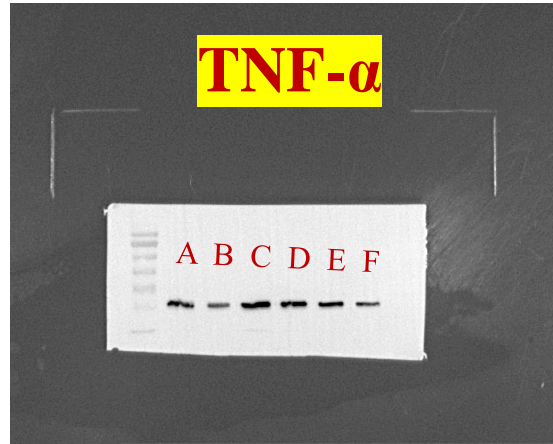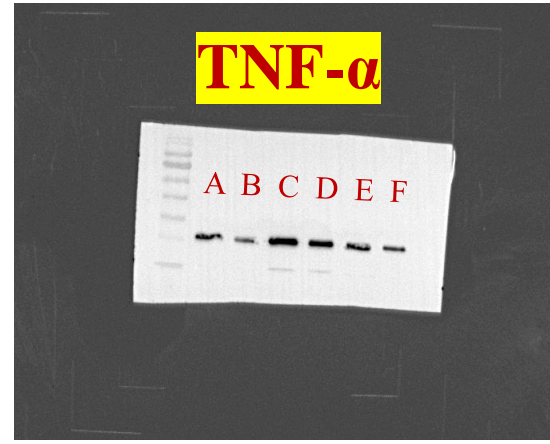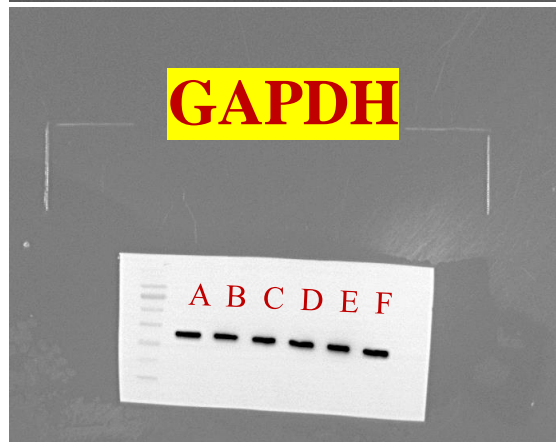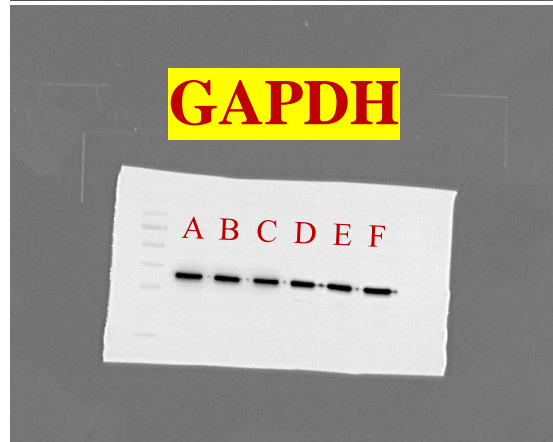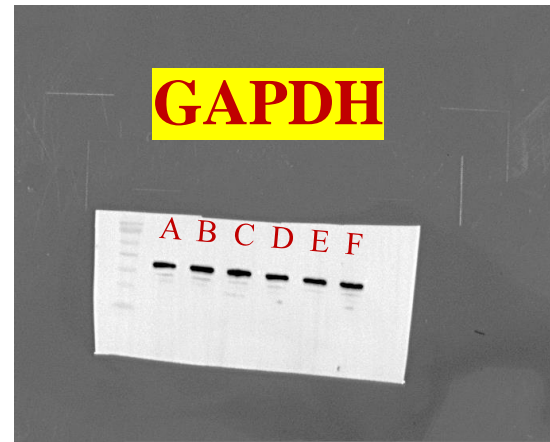

Supplement: peerj-11-16195-s004.pdf [file peerj-11-16195-s004.pdf]
